# Supplementary material
Source: PubMed Central journal article supplement (PMC10529353)
Supplement: NIHMS1924531-supplement-2.pdf [file NIHMS1924531-supplement-2.pdf]

# SUPPLEMENTARY FIGURE 1

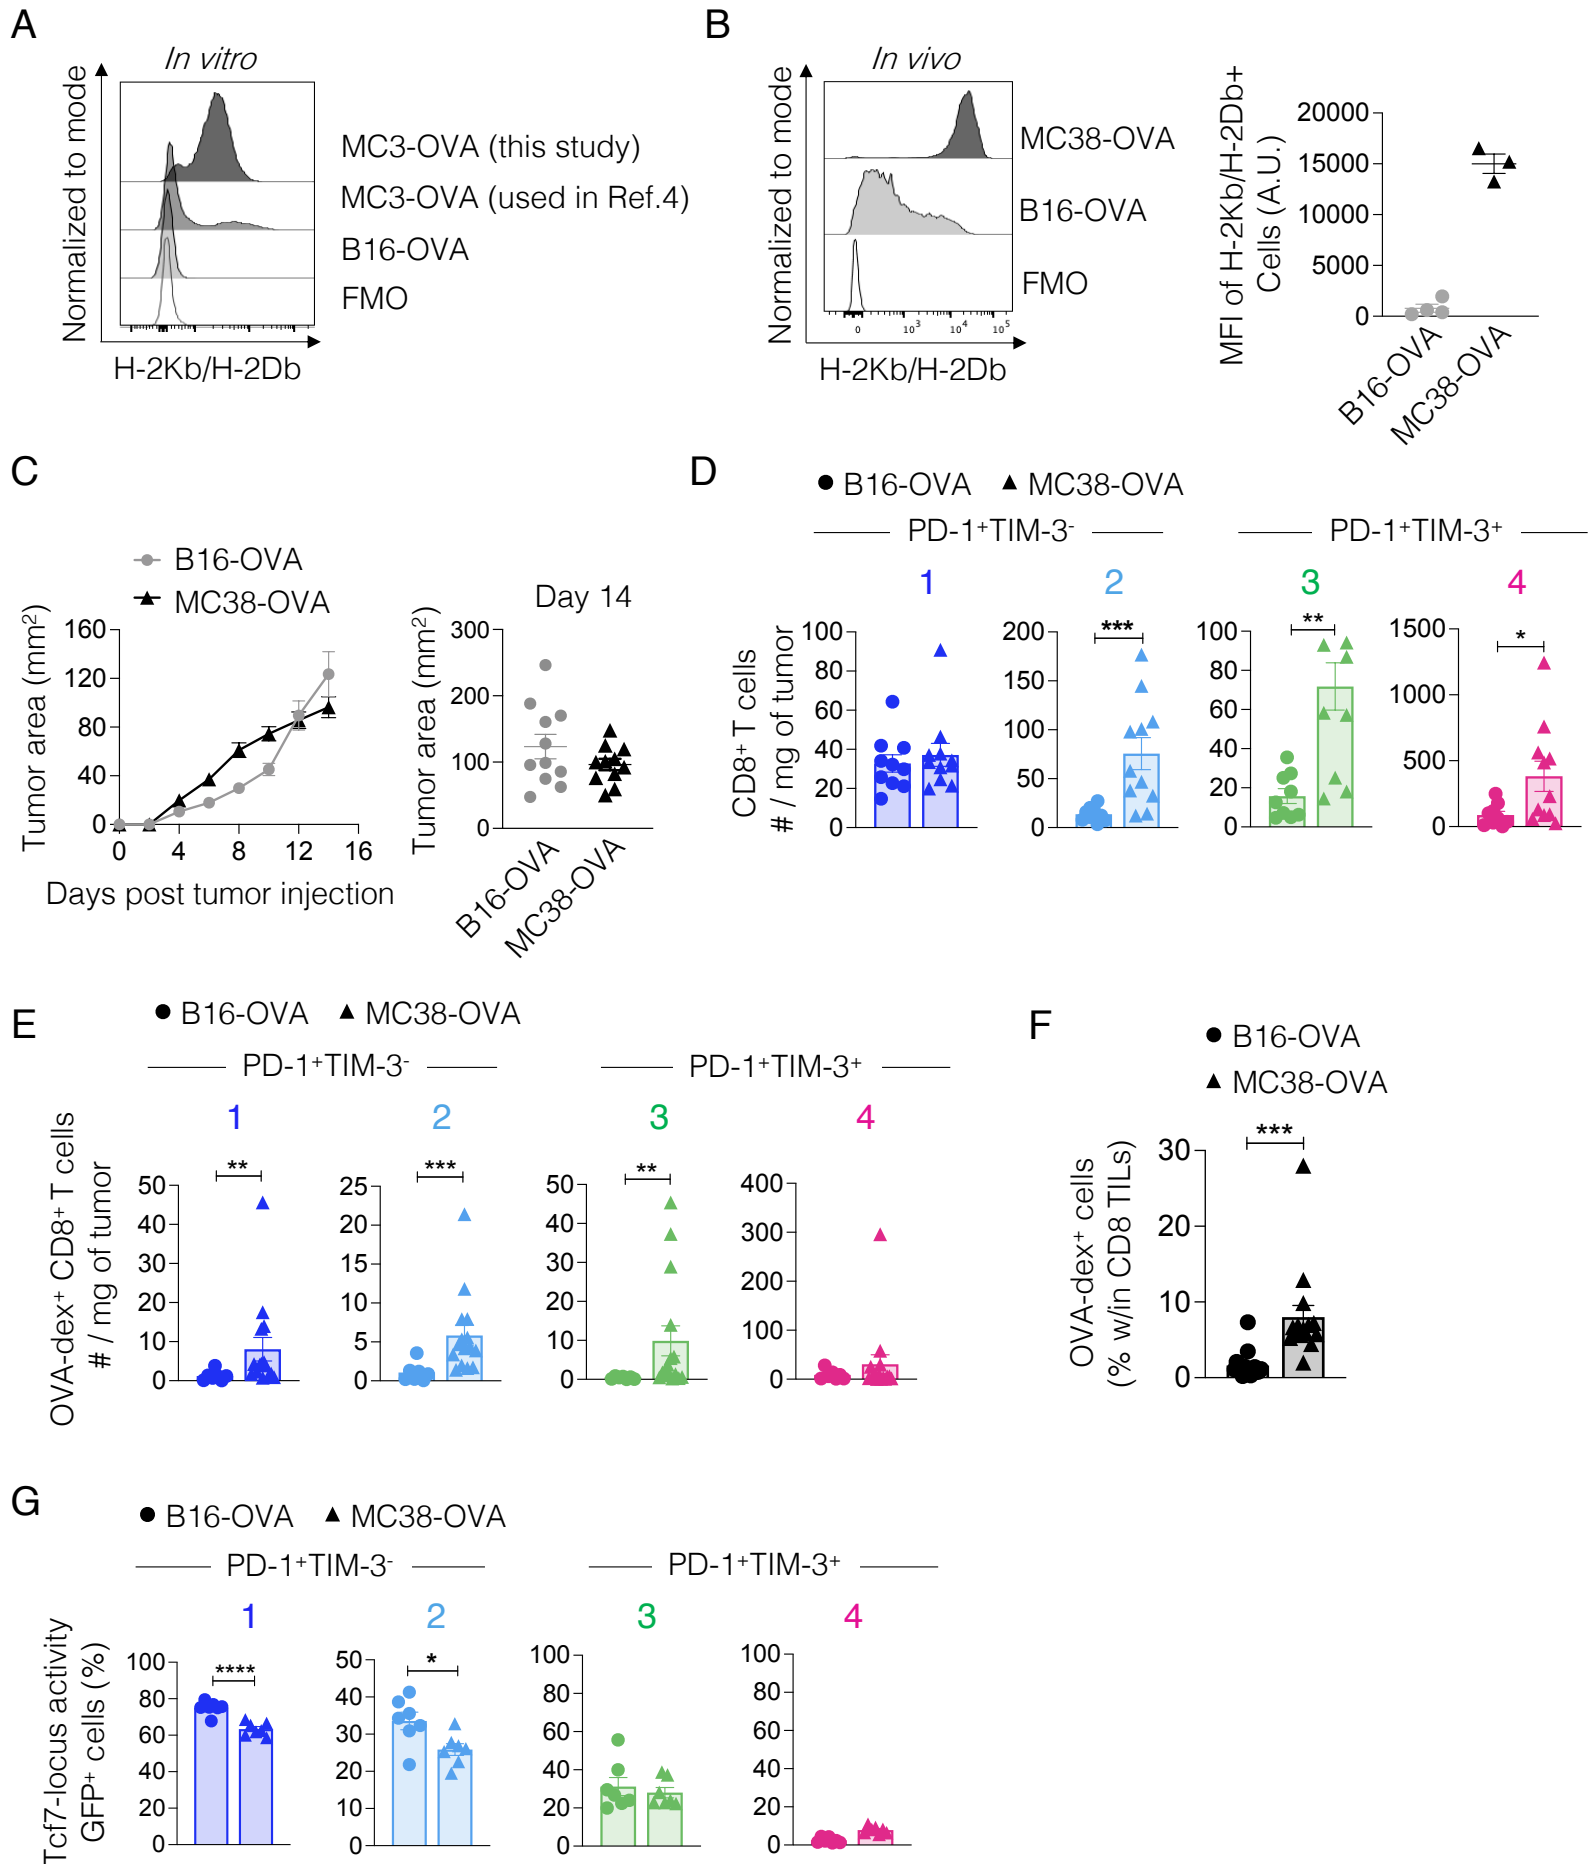

**Supplementary Figure 1. Characterization of B16-OVA and MC38-OVA tumors. Related to Figure 1**

(A) Representative histograms of MHC-I expression in B16-OVA, MC38-OVA (used in this study) and MC38-OVA tumor cells (used in Kurtulus et al., Ref 4) *in vitro*. (B) Representative histograms and quantification of MHC-I expression level (MFI) in B16-OVA or MC38-OVA tumors, 14 days post tumor implant in WT mice. (C) B16-OVA and MC38-OVA tumor area overtime in WT mice. For each mouse (dots) the tumor area at time of analysis (day 14) is shown. n=11, two experiments combined. (D) Number of cells per mg of tumor tissue. PD-1<sup>+</sup>TIM-3<sup>-</sup>SLAMF6<sup>+</sup>CX3CR1<sup>-</sup>CD8<sup>+</sup> population 1 (blue), PD-1<sup>+</sup>TIM-3<sup>-</sup>SLAMF6<sup>lo/neg</sup>CX3CR1<sup>+</sup>CD8<sup>+</sup> population 2 (light blue), PD-1<sup>+</sup>TIM-3<sup>+</sup>CD39<sup>lo/neg</sup>SLAMF6<sup>+</sup>CD8<sup>+</sup> population 3 (green), and PD-1<sup>+</sup>TIM-3<sup>+</sup>CD39<sup>+</sup>SLAMF6<sup>-</sup>CD8<sup>+</sup> population 4 (pink) are gated as defined in Figure 1F within total CD8<sup>+</sup> TILs from MC38-OVA or B16-OVA-bearing WT mice. Analysis is done 14 days post tumor implant. Mann-Whitney t test, \*p<0.05, \*\*p<0.01, \*\*\*p<0.001. n=10-11, two experiments combined. (E) Number of cells per mg of tumor tissue. Shown are the populations defined in Figure 1F and gated within OVA-dextramer<sup>+</sup> CD8<sup>+</sup> TILs. Mann-Whitney t test, \*\*p<0.01, \*\*\*p<0.001. n=5-15, two experiments combined. (F) Frequency of OVA-dextramer<sup>+</sup> CD8<sup>+</sup> TILs in MC38-OVA or B16-OVA tumors. Student's t test. \*\*\*P<0.001. n=15-16, two experiments combined. (G) Frequency of GFP<sup>+</sup> cells in CD8<sup>+</sup> TIL subsets identified in Figure 1F from MC38-OVA or B16-OVA tumors implanted in *Tcf7*-GFP reporter mice. Analysis is done 14 days post tumor implant. Student's t test, \*p<0.05, \*\*\*\*p<0.0001. n=7, one experiment. All values are reported as mean±SEM.

SUPPLEMENTARY FIGURE 2

A

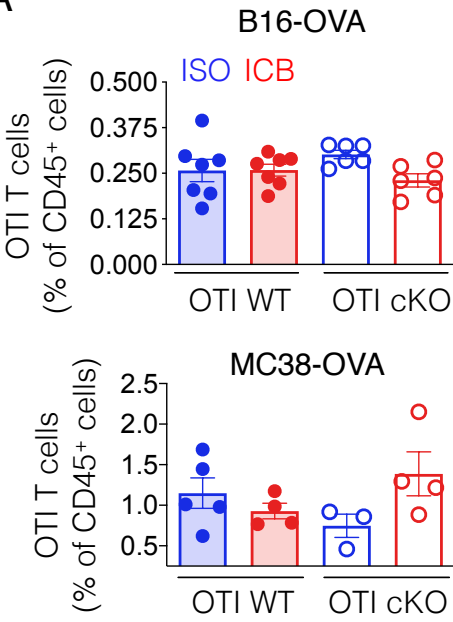

B

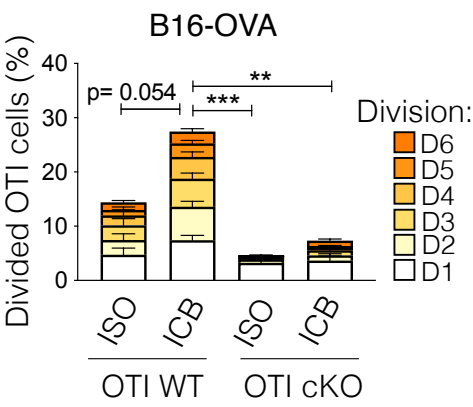

| Divisions | WT ISO | KO ISO | KO ICB |
|-----------|--------|--------|--------|
| D1        | n.s.   | **     | *      |
| D2        | *      | ****   | ****   |
| D3        | n.s.   | ***    | **     |
| D4        | n.s.   | **     | **     |
| D5        | *      | ***    | ***    |
| D6        | n.s.   | ***    | n.s.   |

C

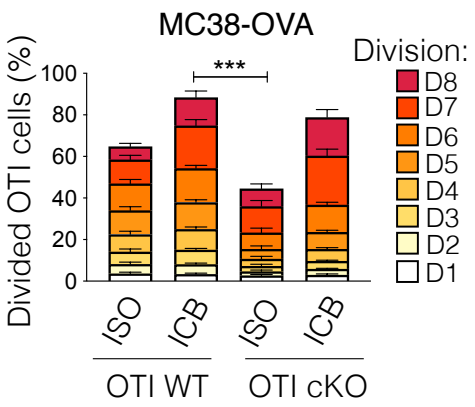

| Divisions | WT ISO | KO ISO | KO ICB |
|-----------|--------|--------|--------|
| D1        | n.s.   | n.s.   | n.s.   |
| D2        | n.s.   | **     | n.s.   |
| D3        | n.s.   | **     | *      |
| D4        | n.s.   | ***    | *      |
| D5        | n.s.   | ***    | *      |
| D6        | n.s.   | **     | n.s.   |
| D7        | n.s.   | n.s.   | n.s.   |
| D8        | n.s.   | n.s.   | n.s.   |

D

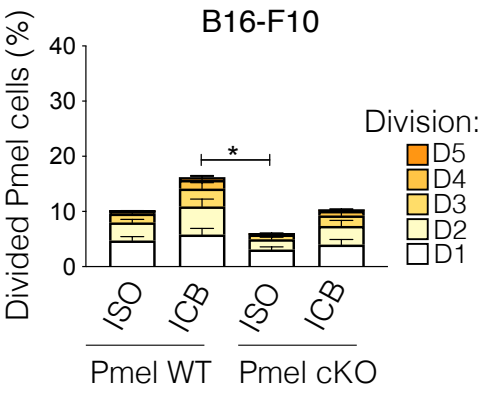

| Divisions | WT ISO | KO ISO | KO ICB |
|-----------|--------|--------|--------|
| D1        | n.s.   | n.s.   | n.s.   |
| D2        | n.s.   | *      | n.s.   |
| D3        | n.s.   | *      | n.s.   |
| D4        | n.s.   | *      | n.s.   |
| D6        | n.s.   | n.s.   | n.s.   |

**Supplementary Figure 2. Defective proliferation of TCF1 cKO T cells in the TDLN of poorly immunogenic tumors. Related to Figure 2**

(A) Frequency of adoptively transferred WT or TCF1 cKO OTI T cells in the TDLN of MC38-OVA (n=3-5, one experiment) or B16-OVA-bearing (n=6-7, two experiments combined) mice three days post adoptive transfer. (B-C) OTI WT and TCF1 cKO T cells are co-transferred at day 5 post tumor inoculation. Mice are treated at day 6 with one dose of ISO (IgG2a + IgG2b) or ICB (anti-TIM-3 + anti-PD-L1). T cells are analyzed three days post transfer (day 8). Frequency of proliferating WT (CD45.1<sup>+</sup>CD45.2<sup>+</sup>) or TCF1 cKO (CD45.2<sup>+</sup>) OTI T cells in each cell division in the TDLN of B16-OVA- (B, n=10-11, two experiments combined) or MC38-OVA-bearing (C, n=12-13, two experiments combined) WT mice. (D) WT (Thy1.2<sup>+</sup>Thy1.1<sup>+</sup>) or TCF1 cKO (Thy1.2<sup>+</sup>) Pmel T cells were co-transferred into B16-F10-bearing WT mice at day 5 post tumor injection. Mice are treated at day 6 with one dose of ISO (IgG2a + IgG2b) or ICB (anti-TIM-3 + anti-PD-L1). T cells are analyzed three days post transfer (day 8). Frequency of proliferating WT and TCF1 cKO Pmel T cells in the TDLN. n=13, two experiments combined. In Figure B-D one-way ANOVA is used to calculate the statistics related to the total frequency of proliferating cells (all comparisons are done versus the WT + ICB group). Statistics within each cell division is calculated using one-way ANOVA and is reported in the tables (all comparisons are done versus the WT + ICB group). \*p<0.05, \*\*p<0.01, \*\*\*p<0.001, \*\*\*\*p<0.0001. All values are reported as mean±SEM.

# SUPPLEMENTARY FIGURE 3

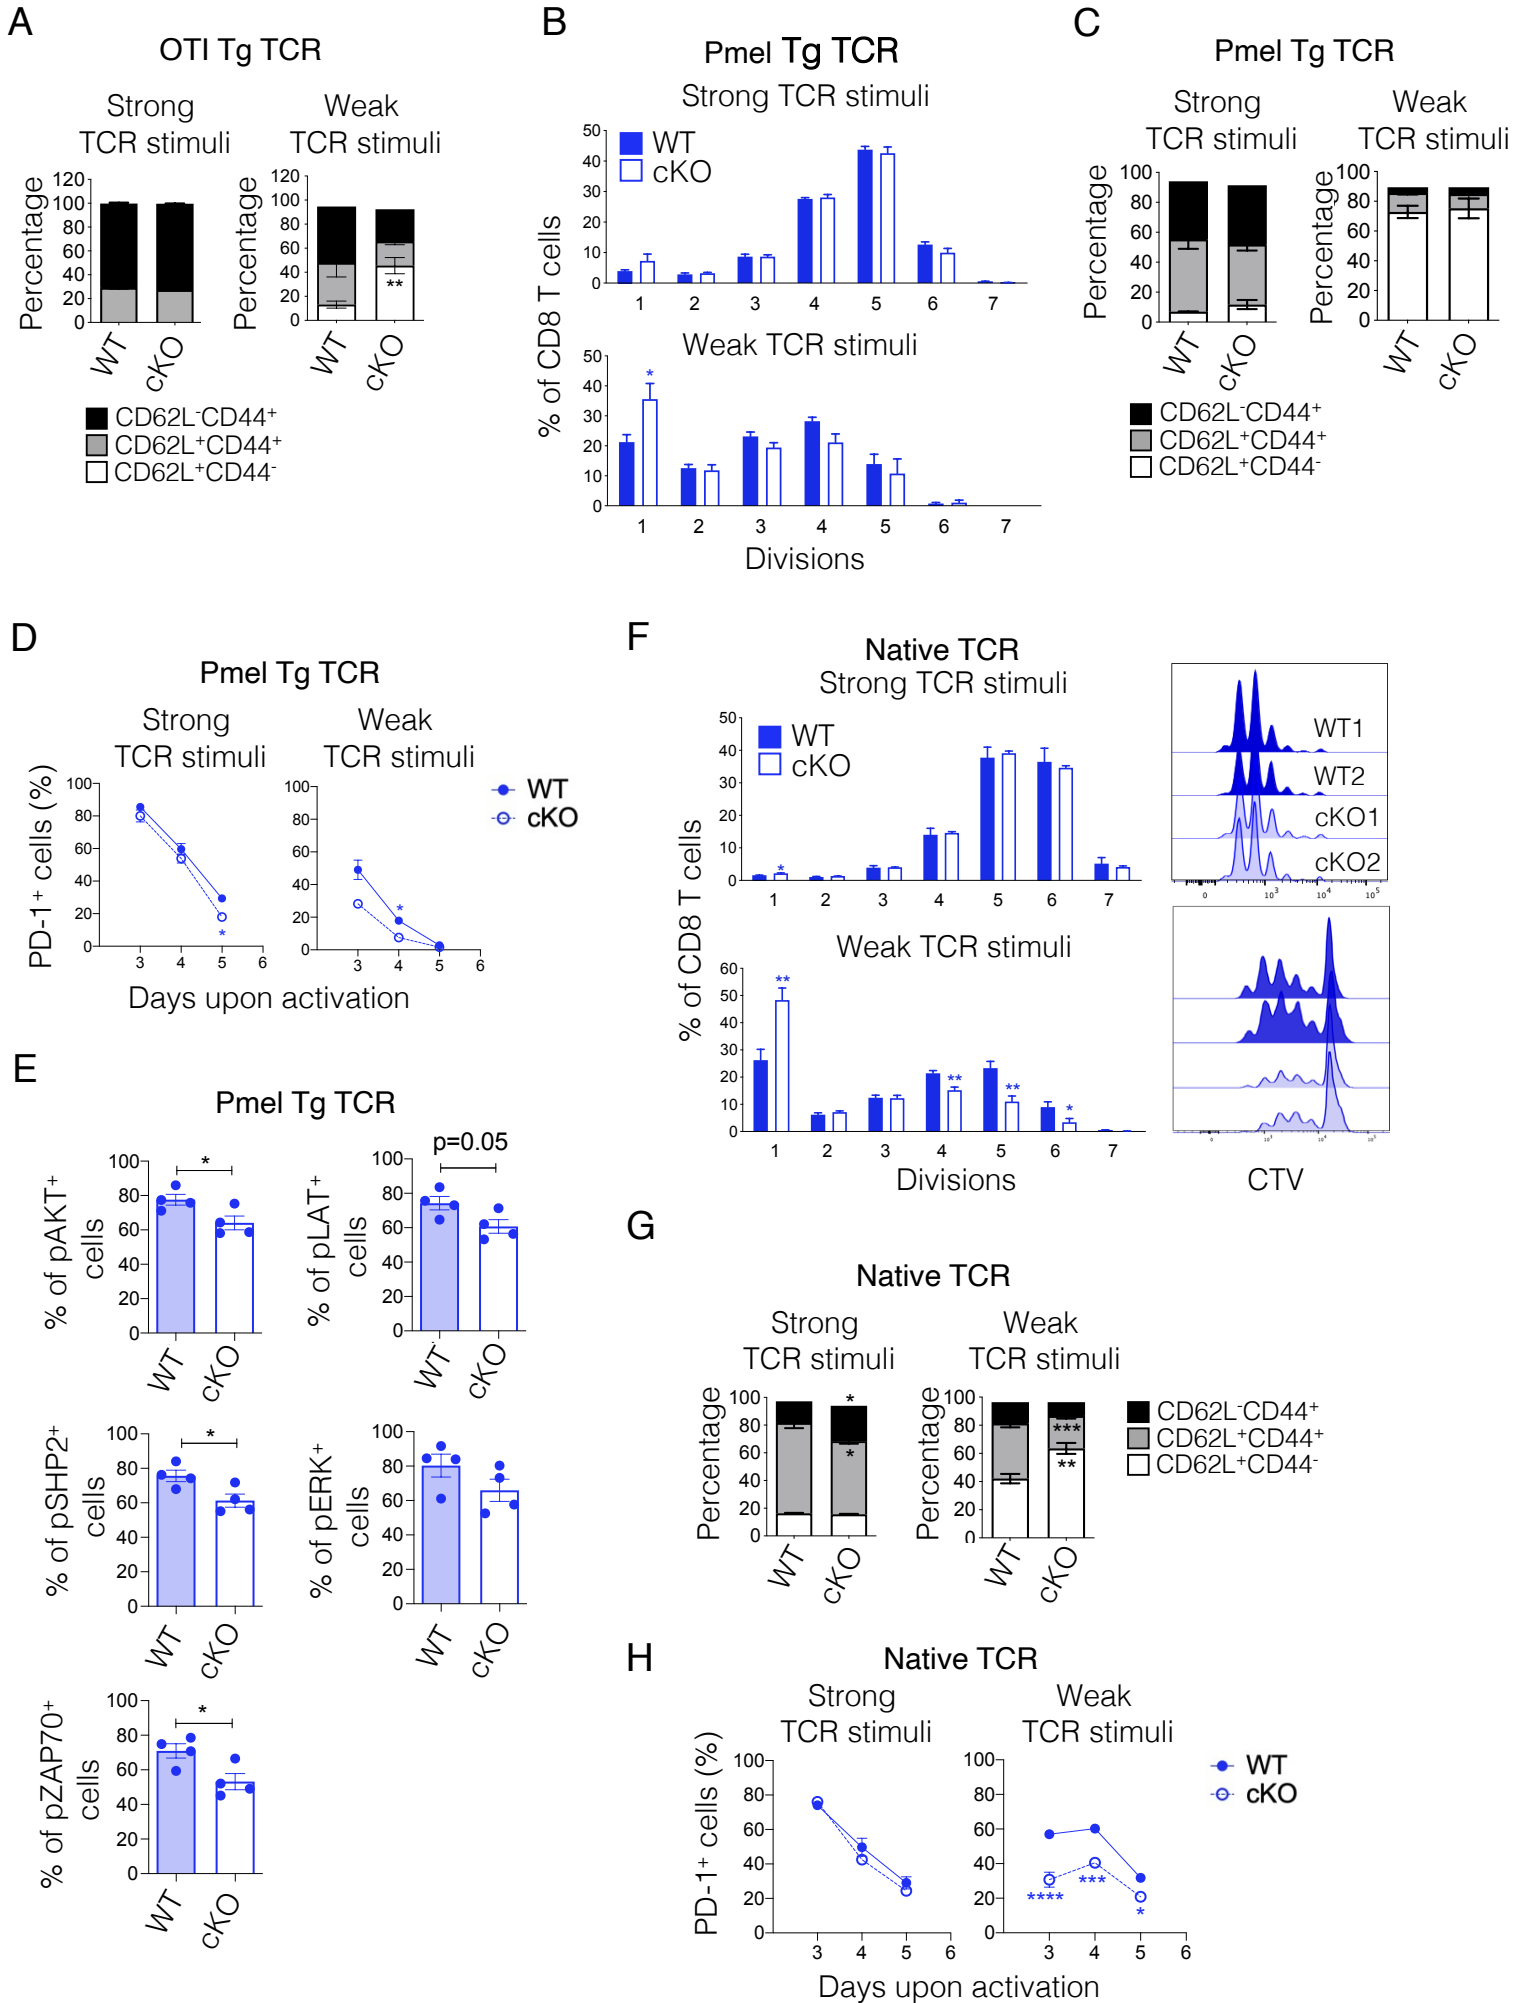

**Supplementary Figure 3. Defective proliferation and reduced TCR signaling in TCF1 cKO T cells activated *in vitro* with low TCR stimuli. Related to Figure 3.**

(A) Frequency of CD62L<sup>+</sup>CD44<sup>-</sup>, CD44<sup>+</sup>CD62L<sup>+</sup> and CD62L<sup>-</sup>CD44<sup>+</sup> cells within WT or TCF1 cKO OTI T cells, three days post activation with a high (1ug/ml; n=3, shown one out of 3 experiments) or low (0.3ug/ml; n=5-6, two experiments combined) dose of anti-CD3 + anti-CD28 *in vitro*. \*\*p<0.01, Student's t test. (B) Frequency of WT or TCF1 cKO Pmel T cells in each cell division. Analyses is done three days post activation with a high (2ug/ml; n=3, one experiment) or low dose (0.3ug/ml; n=4, two experiments combined) of anti-CD3 + anti-CD28 *in vitro*. Student's t test, \*p<0.05. (C) Frequency of CD62L<sup>+</sup>CD44<sup>-</sup>, CD44<sup>+</sup>CD62L<sup>+</sup> and CD62L<sup>-</sup>CD44<sup>+</sup> cells within WT or TCF1 cKO Pmel T cells from B. (D) Frequency of PD-1<sup>+</sup> cells in WT or TCF1 cKO Pmel T cells from B. Two-way ANOVA and Sidak's multiple comparison test, \*p<0.05 (E) Frequency of phospho-AKT, phospho-LAT, phospho-SHP2, phospho-ERK and phospho-ZAP70 in WT or TCF1 cKO Pmel T cells 48 hours post activation with anti-CD3 + anti-CD28 (1ug/ml) *in vitro*. Student's t test, \*p<0.05. n=4, two experiments combined. (F) Representative histograms and frequency of WT or TCF1 cKO T cells (expressing a native TCR repertoire) in each cell division. Analyses is done three days post activation with a high (4ug/ml; n=3) or low (0.3ug/ml; n=6, two experiments combined) dose of anti-CD3 + anti-CD28 antibodies *in vitro*. Student's t test, \*p<0.05, \*\*p<0.01. (G) Frequency of CD62L<sup>+</sup>CD44<sup>-</sup>, CD44<sup>+</sup>CD62L<sup>+</sup> and CD62L<sup>-</sup>CD44<sup>+</sup> cells within WT or TCF1 cKO T cells from F. (H) Frequency of PD-1<sup>+</sup> cells in WT or TCF1 cKO T cells from F. Student's t test, \*p<0.05, \*\*p<0.01, \*\*\*p<0.001. All values are reported as mean±SEM.

# SUPPLEMENTARY FIGURE 4

A

Increasing affinity for cognate TCR

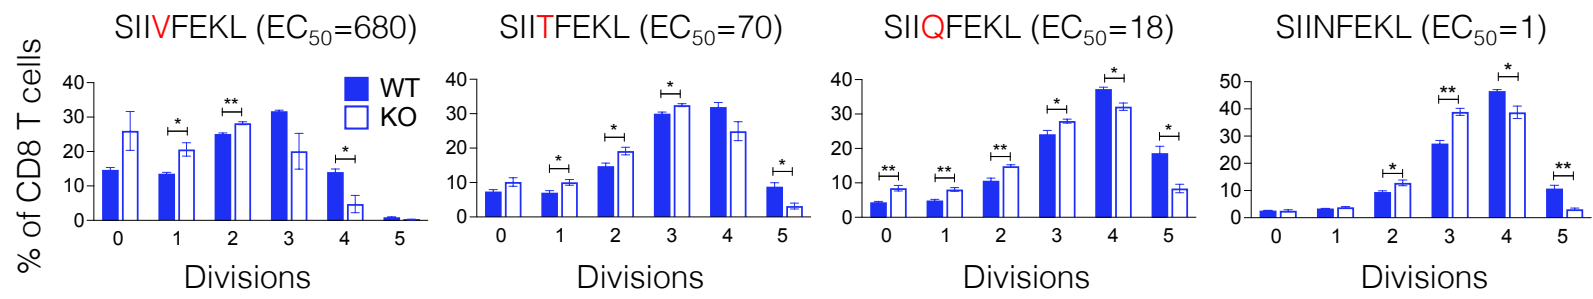

B

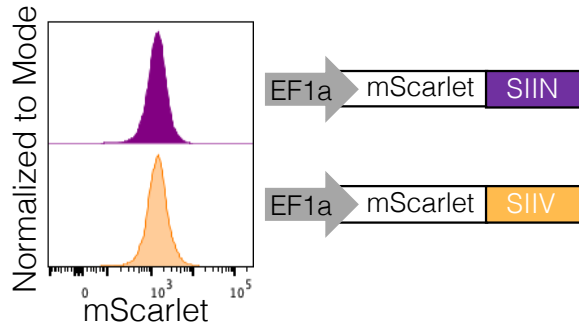

C

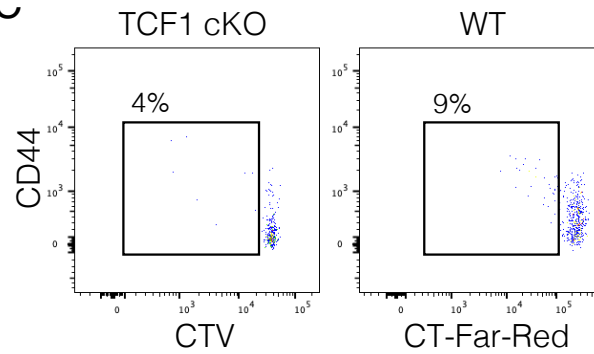

**Supplementary Figure 4. Defective proliferation of TCF1 cKO T cells stimulated with low affinity OVA peptide variants. Related to Figure 3.**

(A) Frequency (mean $\pm$ SEM) of WT and TCF1 cKO OTI T cells in each cell division, three days post *in vitro* co-culture with BM-DC pulsed with SIIVFEKL (17.78nM), SIITFEKL (0.219nM), SIIQFEKL (0.024nM), and SIINFEKL (0.024nM) peptides. For each peptide, the highest dose tested that resulted in overt defective proliferation in TCF1 cKO T cells is shown. Student's t test. \*p<0.05, \*\*p<0.01. n=3, one experiment. (B) Representative plot of mScarlet expression in MC38 tumor cells engineered with the indicated lentiviral vectors. (C) Representative plots of proliferating (cell trace dye-diluted) WT or TCF1 cKO OTI T cells adoptively co-transferred into mice implanted with MC38-SIIVFEKL tumors and harvested from the TDLN three days post T cell transfer (i.e. day 9 post tumor injection).

## SUPPLEMENTARY FIGURE 5

A

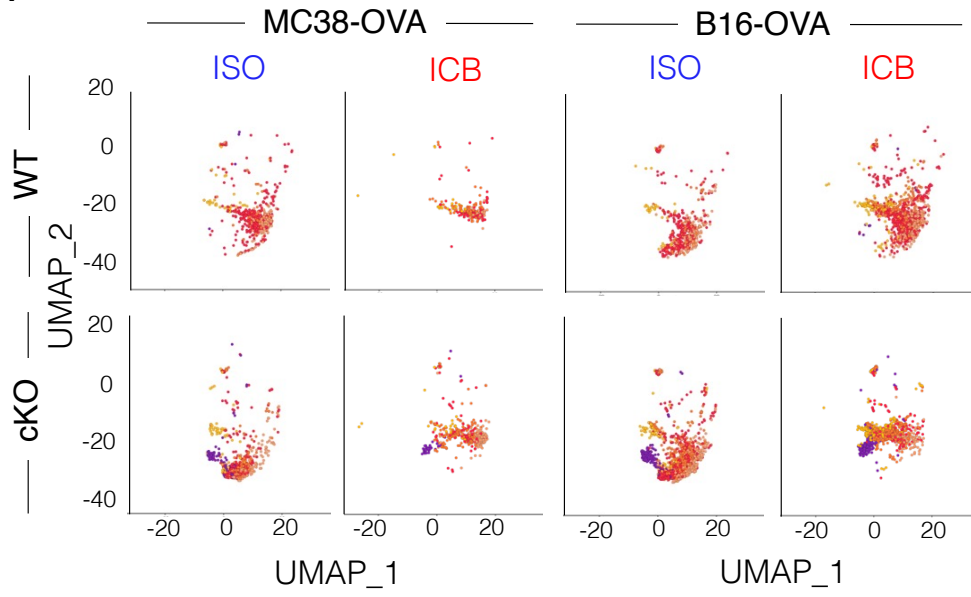

B

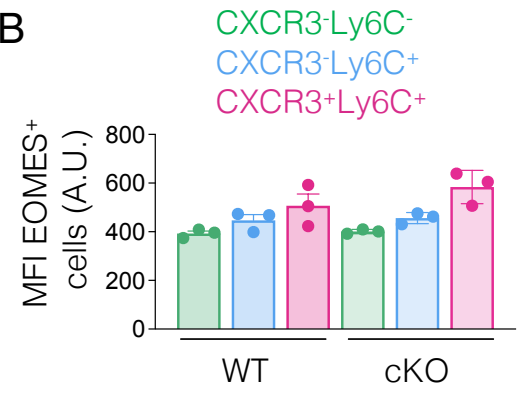

C

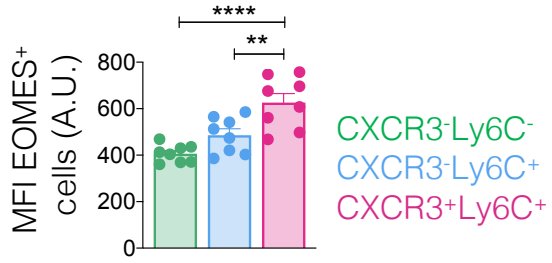

**Supplementary Figure 5. Composition of naïve cells within WT and TCF1 cKO OTI T cells present in the TDLN of MC38-OVA- or B16-OVA-bearing mice. Related to Figure 5.**

(A) Distribution of single-cell events from the naïve cluster (from Figure 5A) in each experimental sample and treatment condition. Single-cells are colored and grouped based on the 5 naïve clusters from Figure 5A. (B) EOMES expression level (MFI, mean $\pm$ SEM) in the three naïve subsets defined in Figure 5E and identified in tumor-free WT and TCF1 cKO mice. n=3, shown one out of two experiments. (C) EOMES expression level (MFI, mean $\pm$ SEM) of in the indicated naïve subsets found in adoptively transferred WT or TCF1 cKO OTI T cells harvested from the TDLN of MC38-OVA-bearing mice (n=8, shown one out of two experiments). Analysis is done three days post adoptive T cell transfer. One-way ANOVA, \*\*p<0.01, \*\*\*\*p<0.0001.

# SUPPLEMENTARY FIGURE 6

**A**

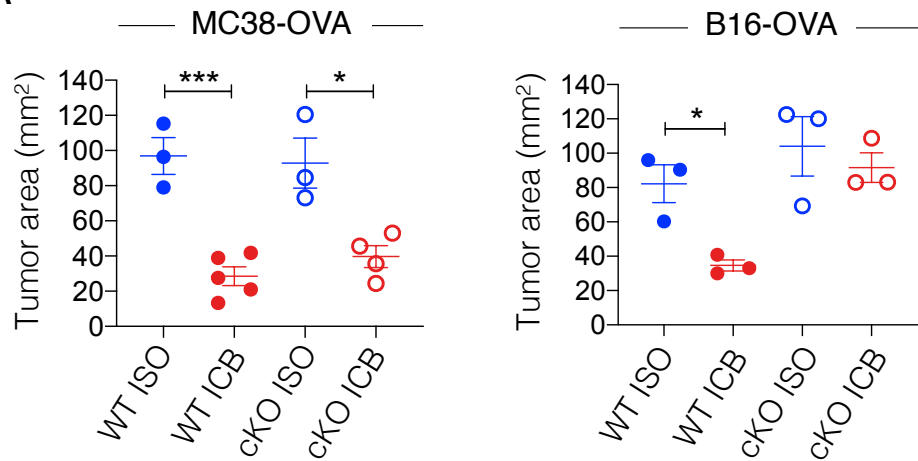

**B**

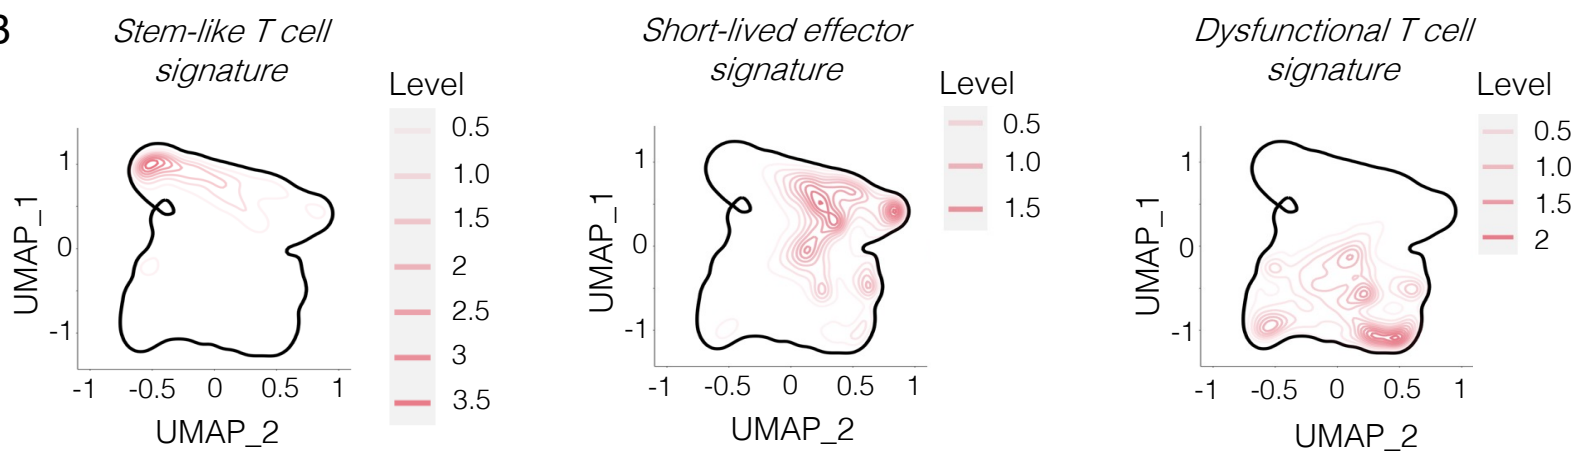

**C**

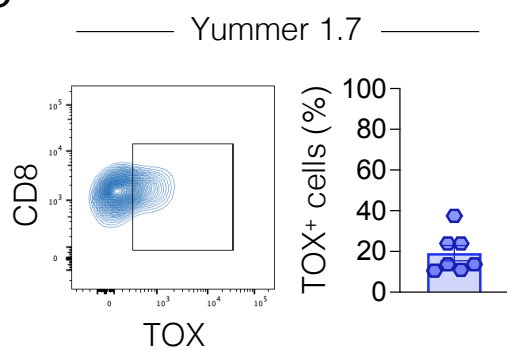

**D**

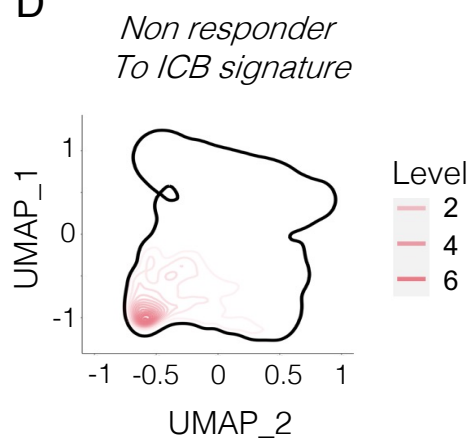

**E**

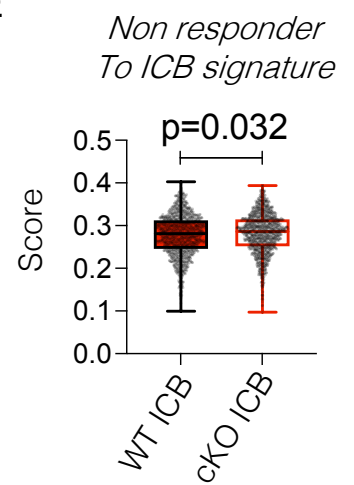

**Supplementary Figure 6. Transcriptional analysis of WT and TCF1 cKO CD8<sup>+</sup> TILs from MC38-OVA or B16-OVA tumors. Related to Figures 6 and 7.**

(A) MC38-OVA or B16-OVA area (mean $\pm$ SEM, day 11 or 12 post tumor injection, respectively) from WT (n=3-5) or TCF1 cKO (n=3-4) mice used to perform scRNA-seq on CD8<sup>+</sup> TILs. Mice received either control or anti-PD-L1 + anti-TIM-3 antibodies on day 6 and 9 prior to harvesting CD8<sup>+</sup> TILs. (B) Projection of stem-like, short-lived effector and dysfunctional T cell signatures displayed as single-cell density over the global UMAP from Figure 6A. (C) Representative plot and quantification (frequency, mean $\pm$ SEM) of TOX expression in PD-1<sup>+</sup>TIM-3<sup>+</sup>CD8<sup>+</sup> TILs present in Yumme1.7 melanomas. n=7, one experiment. (D) Projection of non-responder to ICB signature displayed as single-cell density over the global UMAP from Figure 6A. (E) Expression score of the non-responder to ICB signature on the proliferating TOX<sup>+</sup>TIM-3<sup>+</sup>PD-1<sup>+</sup>CD8<sup>+</sup> TILs (cluster 8 from figure 6A) from WT or TCF1 cKO B16-OVA-bearing mice treated with ICB. Mann-Whitney test, \*p<0.05. Bottom, middle, and upper lines denote lower quartile (Q1), median and upper quartile (Q3), respectively. Whiskers denote minimum (Q1 – 1.5 x interquartile range) and maximum (Q3 + 1.5 x interquartile range).

# SUPPLEMENTARY FIGURE 7

A

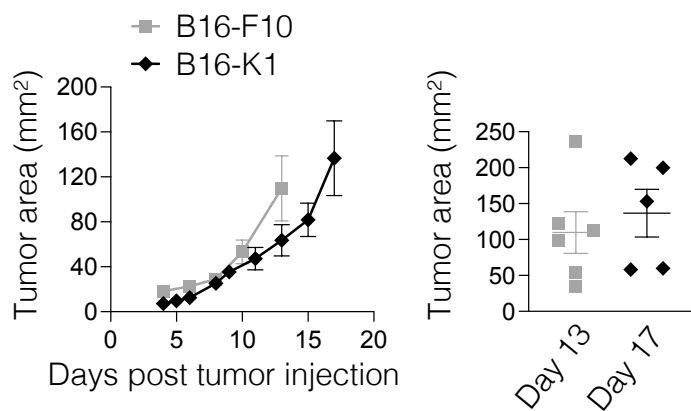

B

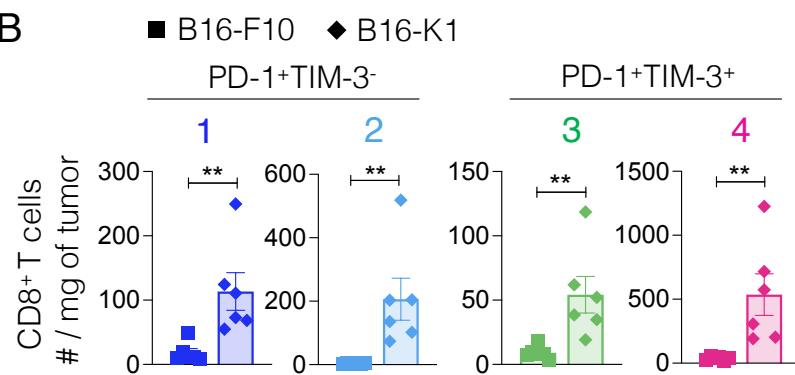

C

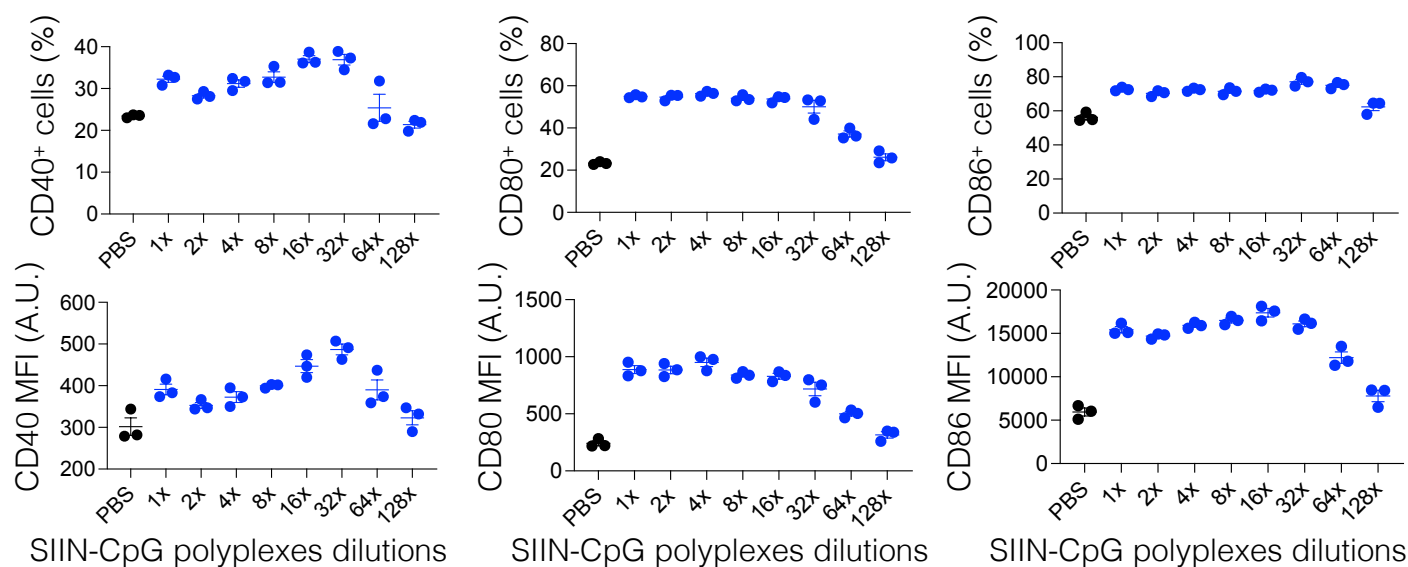

D

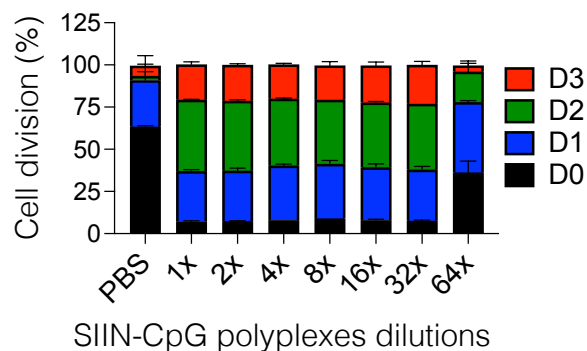

**Supplementary Figure 7. Characterization of B16-F10 and B16-K1 tumors and of the SIIN-CpG polyplex vaccine. Related to Figure 8.**

(A) B16-F10 and B6-K1 tumor growth (area, mean $\pm$ SEM) in WT mice. For each mouse (dots) the tumor area at time of analysis (day 13 for B16-F10 or day 17 for B16-K1) is shown. n=6, one experiment. (B) Number of cells (mean $\pm$ SEM) per mg of tumor tissue. PD-1<sup>+</sup>TIM-3<sup>-</sup>SLAMF6<sup>+</sup>CX3CR1<sup>-</sup>CD8<sup>+</sup> population 1 (blue), PD-1<sup>+</sup>TIM-3<sup>-</sup>SLAMF6<sup>lo/neg</sup>CX3CR1<sup>+</sup>CD8<sup>+</sup> population 2 (light blue), PD-1<sup>+</sup>TIM-3<sup>+</sup>CD39<sup>lo/neg</sup>SLAMF6<sup>+</sup>CD8<sup>+</sup> population 3 (green), and PD-1<sup>+</sup>TIM-3<sup>+</sup>CD39<sup>+</sup>SLAMF6<sup>-</sup>CD8<sup>+</sup> population 4 (pink) are gated as defined in Figure 1F within total CD8<sup>+</sup> TILs present in B16-F10- or B16-K1-tumor-bearing WT mice. Analysis is done at 13 (B16-F10) or 17 (B16-K1) days post tumor implant. n=6, one experiment. Mann-Whitney t test, \*\*p<0.01. (C) Frequency (mean $\pm$ SEM) and levels (MFI, mean $\pm$ SEM) of the indicated co-stimulatory molecules expressed on splenic dendritic cells 18 hours after pulsing with increasing dilutions of the SIIN-CpG polyplexes or with PBS as control. n=3, one experiment. (D) Frequency (mean $\pm$ SEM) of CD8<sup>+</sup> T cells in the indicated cell divisions three days after co-culture with splenic DCs pulsed with the indicated dilutions of SIIN-CpG polyplexes. n=3, one experiment.
